# Supplementary material for: Higher cholesterol levels, not statin use, are associated with a lower risk of hepatocellular carcinoma
Source: PubMed Central journal article supplement (PMC7054540; doi:10.1038/s41416-019-0691-3), 2019-12-20
Supplement: 41416_2019_691_MOESM1_ESM.pdf [file 41416_2019_691_MOESM1_ESM.pdf]

## Online-only Supplementary Data

### Higher cholesterol levels, not statin use, are associated with a lower risk of hepatocellular carcinoma

**Sang-Wook Yi**, Department of Preventive Medicine and Public Health, Catholic Kwandong University College of Medicine, Republic of Korea; **Se Hwa Kim** and **Ki Jun Han**, Department of Internal Medicine, Catholic Kwandong University College of Medicine, Republic of Korea; **Jee-Jeon Yi**, Institute of Epidemiology and Public Health, Catholic Kwandong University, Republic of Korea; **Heechoul Ohrr**, Department of Preventive Medicine, Yonsei University College of Medicine, Republic of Korea

Correspondence: Sang-Wook Yi, MD, PhD, Department of Preventive Medicine and Public Health, Catholic Kwandong University College of Medicine, Bumil-ro 579, Gangneung, Gangwon-do, 25601, Republic of Korea; Tel: +82-33-649-7468; Fax +82-33-641-1074. e-mail: [flyhigh@cku.ac.kr](mailto:flyhigh@cku.ac.kr)

## **METHODS**

### **Study population**

The National Health Insurance Service (NHIS) provides mandatory health insurance for 97% of the Korean population and nationwide biennial health screening.<sup>1,2</sup> The original cohort (n=514,886) was a 10% random sample of the 5.15 million NHIS beneficiaries aged 40-79 years in 2002 who received a health examination in 2002 or 2003. More details on the national health screening program and original cohort are available elsewhere.<sup>2</sup> Among the cohort, 4669 persons with a history of cancer or missing information were excluded, as were non-participants in health examinations during 2004-2007 (n=91,627) and 208 persons who developed HCC before the 2004-2007 health examinations or were missing information for the 2004-2007 health examination (Figure S1). Since the NHIS prescription database was available during 2002-2013, to assess statin use up to 2 years after (or before) the health examinations, participants in the 2004-2007 examinations were selected for the current analyses. The remaining 418,382 individuals comprised the cohort that included prevalent statin users. The main study cohort (n=400,318) was generated by excluding prevalent statin users during the 6 months before the 2004-2007 health examinations and the first 6 months of follow-up. Additionally, a sensitivity analysis cohort (n=385,945) was created by excluding prevalent users during the 2 years before the 2004-2007 health examinations, to minimize prevalent user bias more thoroughly.

The authors were granted access by the NHIS to the anonymized data. This study was approved by the Institutional Review Board of Catholic Kwandong University, Republic of Korea. Informed consent was waived because the study used anonymized data constructed by the NHIS according to a strong confidentiality protocol.

### **Study outcomes and follow-up**

We followed up study participants from the date of the 2004-2007 baseline health examinations (index date for the analysis) until December 31, 2013 via record linkage to hospital discharge records from the NHIS, in which certified health information managers review the medical records and assign standardized diagnosis codes according to the International Classification of Diseases 10th revision (ICD-10).<sup>3</sup> The completeness of the cancer incidence data from NHIS is comparable to that of the Korea National Cancer Incidence Database, which was estimated to be 97.8%.<sup>4,5</sup> All patients discharged from the hospital due to HCC (ICD-10: C220) for the first time during follow-up were considered incident cases.

### **Exposure to statins**

Information on the prescriptions of each statin, including atorvastatin, fluvastatin, lovastatin, pitavastatin, pravastatin, rosuvastatin, and simvastatin, was obtained from the NHIS prescription database during 2002-2013. The NHIS prescription database contains prospective records of all prescriptions by doctors to be dispensed by Korean pharmacies. The names of the prescribed drugs, date of prescription, daily

dosage, and duration of each prescription were collected. The defined daily doses (DDD) recommended by the World Health Organization were used to quantify statin usage.<sup>6</sup> Cumulative DDDs (cDDD) within 6 months before/after, within 2 years before/after baseline were estimated as the sum of the prescribed DDDs of any statins during the specified period.

### **Data collection**

Total cholesterol (TC) and glucose were assayed using fasting serum samples by enzymatic methods. Alanine aminotransferase (ALT) and aspartate aminotransferase were measured using the NADH-UV method or the Reitman-Frankel method. Systolic blood pressure was measured in a seated position. Body mass index (BMI) was calculated as the measured weight in kilograms divided by the square of measured height in meters ( $\text{kg}/\text{m}^2$ ).<sup>1</sup> A single measurement was made at each health examination. Smoking status, alcohol use, physical activity, and history of cancer were assessed via a questionnaire. Health examinations and data collection followed a standard protocol officially documented by the government. The external quality assessments for clinical chemistry in participating hospitals were regularly performed.

### **Medical risk factors at baseline**

We considered individuals to have known prevalent disease at baseline if they visited a medical institution for the diagnosed diseases—either as inpatients or outpatients—at least once within 12 months before or 2 months after the baseline health examination date, via record linkage to healthcare utilization records from the NHIS. The medical risk factors for HCC were selected using the ICD-10 codes: hepatitis B virus (HBV) infection: B16, B180, B181; hepatitis C virus (HCV) infection: B171, B182; diabetes: E10-E14; liver cirrhosis: K74. Persons with fasting glucose level  $\geq 126$  mg/dL (7 mmol/L) at the baseline health examinations were also considered to have diabetes.

### **Statistical analysis**

The dosages (cDDD) and timing of statin use after (or before) baseline were evaluated as continuous and categorical variables. Hazard ratios (HRs) for HCC incidence were calculated using Cox proportional hazards models stratified by age at baseline (years; 40-44, 45-54, 55-64, 65-74, and  $\geq 75$ ) after adjustment for age at baseline (continuous variable; within each age group), sex, smoking status (current smoker, former smoker, never smoker, and missing information [ $n=17,029$ ]), alcohol use (g ethanol/day; none,  $<10$ , 10-39,  $\geq 40$ , and missing information [ $n=18,372$ ]), physical activity (at least once a week; yes, and no), beneficiary income status (deciles; below 4 [low income], 4-7, 8-10 [high income]), BMI (continuous variable), ALT (IU/L,  $<20$ , 20-39, 40-59, 60-79, and  $\geq 80$ ), diabetes, HBV infection, HCV infection, and liver cirrhosis. Co-variables measured in the 2004-2007 examinations were used in the Cox models, while for the behavioral factors, data collected in the 2002-2003 examinations were used considering the

possibility of behavioral changes due to recent health issues. Analyses with varying cohorts and adjustment for varying confounders were used as sensitivity analyses. All *p* values were 2-sided. All analyses used SAS version 9.4 (SAS Institute Inc., Cary, NC, USA).

## REFERENCE

1. Yi SW, Ohrr H, Shin SA, Yi JJ. Sex-age-specific association of body mass index with all-cause mortality among 12.8 million Korean adults: a prospective cohort study. *Int J Epidemiol* 2015;44:1696-1705.
2. Seong SC, Kim YY, Park SK, et al. Cohort profile: the National Health Insurance Service-National Health Screening Cohort (NHIS-HEALS) in Korea. *BMJ Open* 2017;7:e016640.
3. Yi SW, Choi JS, Yi JJ, Lee YH, Han KJ. Risk factors for hepatocellular carcinoma by age, sex, and liver disorder status: A prospective cohort study in Korea. *Cancer* 2018;124:2748-2757.
4. Oh CM, Won YJ, Jung KW, et al. Cancer Statistics in Korea: Incidence, Mortality, Survival, and Prevalence in 2013. *Cancer Res Treat* 2016;48:436-450.
5. Seo HJ, Oh IH, Yoon SJ. A comparison of the cancer incidence rates between the national cancer registry and insurance claims data in Korea. *Asian Pac J Cancer Prev* 2012;13:6163-6168.
6. WHO Collaborating Centre for Drug Statistics Methodology. ATC/DDD Index 2018. [https://www.whooc.no/atc\\_ddd\\_index/](https://www.whooc.no/atc_ddd_index/), vol. 2018.

- The National Health Insurance Service (NHIS) provides mandatory health insurance for 97% of the Korean population and nationwide biennial health screening.
- Clinical chemistry and anthropometric and blood pressure measurement are performed, and information on smoking status, alcohol use, physical activity, and history of various diseases was collected via a questionnaire, during each biennial health examinations (HEs).
- The HEs and data collection followed a standard protocol documented by the Ministry of Health and Welfare.

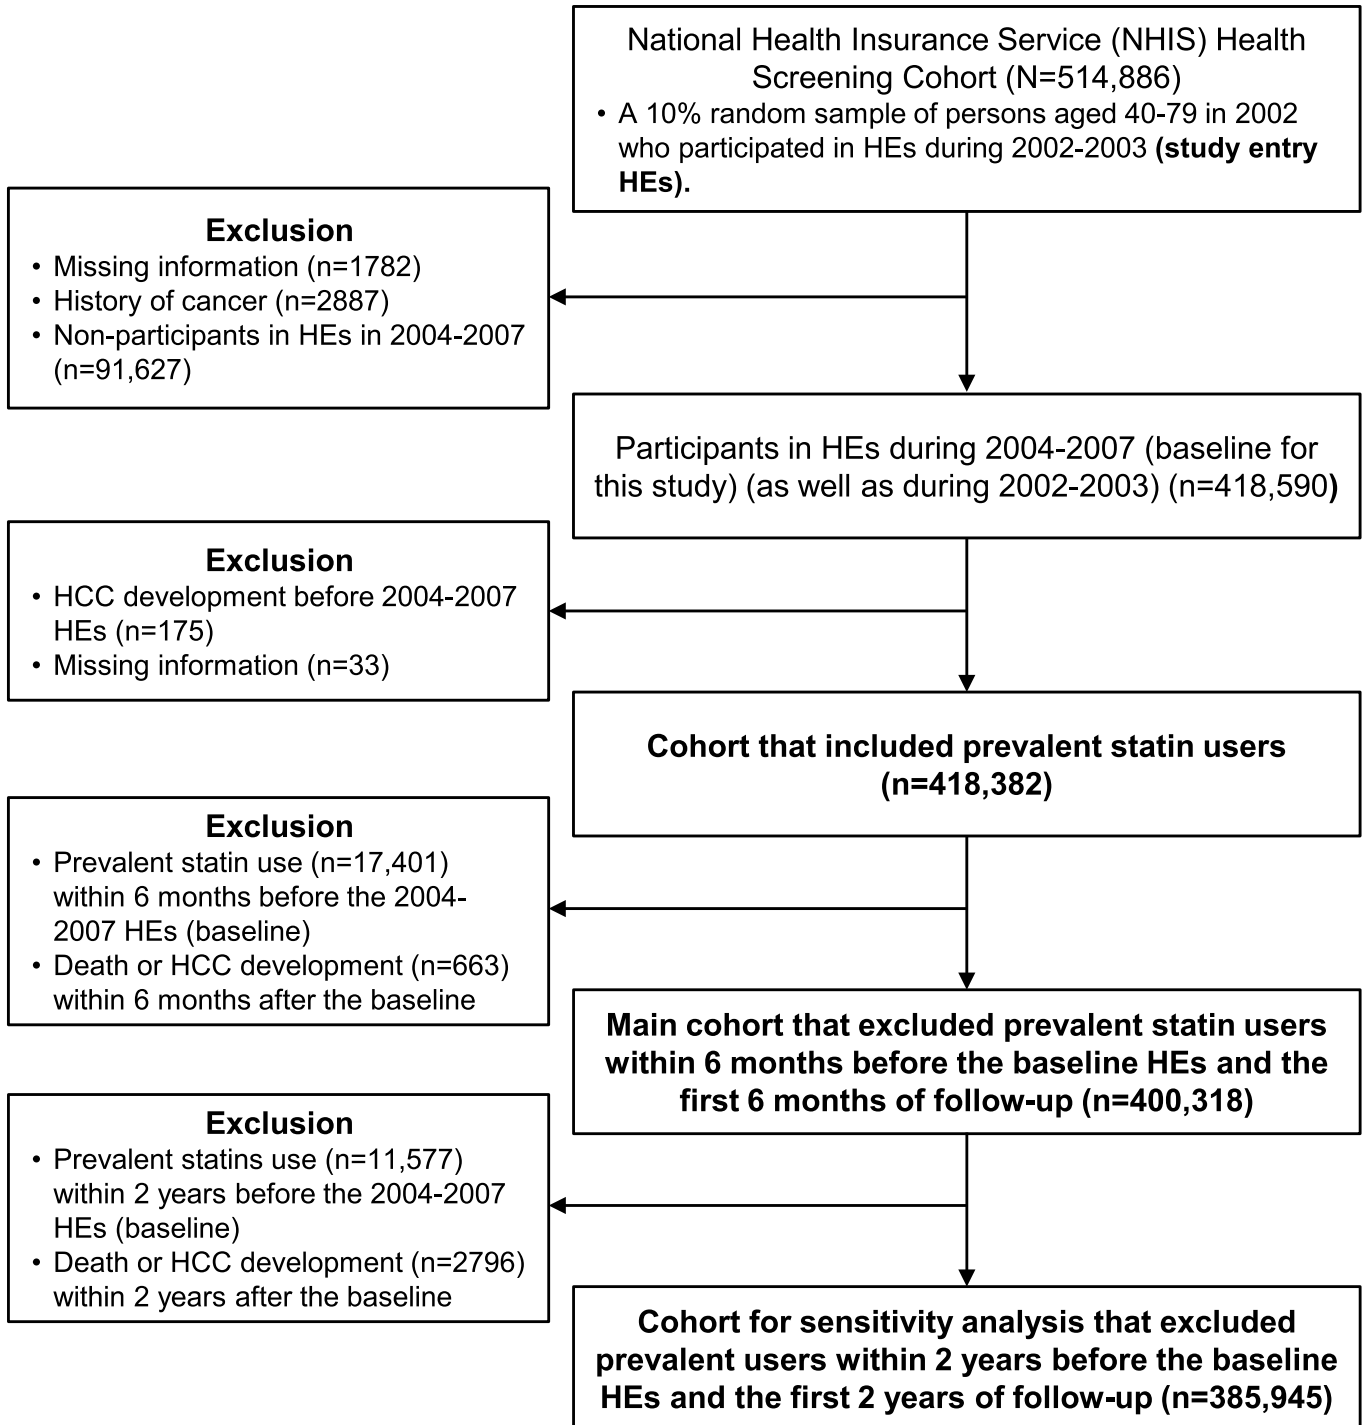

**Figure S1. Flow diagram of the study.**

HCC, hepatocellular carcinoma; HE, health examination

**Table S1. Characteristics of participants according to incident HCC status.**

| Variables                                 | Characteristics   | Total          | No HCC         | Incident HCC | p      |
|-------------------------------------------|-------------------|----------------|----------------|--------------|--------|
|                                           |                   | N=400,318      | n=398,632      | n=1686       |        |
| Age                                       | years             | 54.8 ±9.4      | 54.8 ±9.4      | 57.6 ±9.3    | <0.001 |
| Total cholesterol <sup>a</sup>            | mg/dL             | 198.6 ±36.7    | 198.7 ±36.6    | 174.1 ±35.5  | <0.001 |
| Body mass index                           | kg/m <sup>2</sup> | 23.9 ±2.9      | 23.9 ±2.9      | 23.9 ±3.0    | 0.619  |
| Sex                                       | Women             | 178,136 (44.5) | 177,864 (44.6) | 272 (16.1)   | <0.001 |
|                                           | Men               | 222,182 (55.5) | 220,768 (55.4) | 1414 (83.9)  |        |
| Smoking status                            | Never smoker      | 256,473 (64.1) | 255,647 (64.1) | 826 (49.0)   | <0.001 |
|                                           | Past smoker       | 35,280 (8.8)   | 35,082 (8.8)   | 198 (11.7)   |        |
|                                           | Current smoker    | 91,536 (22.9)  | 90,946 (22.8)  | 590 (35.0)   |        |
|                                           | Missing           | 17,029 (4.3)   | 16,957 (4.3)   | 72 (4.3)     |        |
| Alcohol use, g ethanol/day                | None              | 217,990 (54.5) | 217,225 (54.5) | 765 (45.4)   | <0.001 |
|                                           | <10               | 82,568 (20.6)  | 82,216 (20.6)  | 352 (20.9)   |        |
|                                           | 10-39             | 72,219 (18.0)  | 71,845 (18.0)  | 374 (22.2)   |        |
|                                           | ≥40               | 18,372 (4.6)   | 18,213 (4.6)   | 159 (9.4)    |        |
|                                           | Missing           | 9,169 (2.3)    | 9,133 (2.3)    | 36 (2.1)     |        |
| Physical activity                         | ≥1 times/week     | 168,723 (42.1) | 168,003 (42.1) | 720 (42.7)   | 0.642  |
| Income status, decile                     | <4 (low-income)   | 89,060 (22.2)  | 88,630 (22.2)  | 430 (25.5)   | 0.003  |
|                                           | 4-7               | 128,794 (32.2) | 128,253 (32.2) | 541 (32.1)   |        |
|                                           | >7 (high-income)  | 182,464 (45.6) | 181,749 (45.6) | 715 (42.4)   |        |
| Alanine aminotransferase,                 | <20 IU/L          | 176,623 (44.1) | 176,462 (44.3) | 161 (9.5)    | <0.001 |
|                                           | 20-39 IU/L        | 178,698 (44.6) | 178,067 (44.7) | 631 (37.4)   |        |
|                                           | 40-59 IU/L        | 30,845 (7.7)   | 30,429 (7.6)   | 416 (24.7)   |        |
|                                           | 60-79 IU/L        | 8,059 (2.0)    | 7,845 (2.0)    | 214 (12.7)   |        |
|                                           | ≥80 IU/L          | 6,093 (1.5)    | 5,829 (1.5)    | 264 (15.7)   |        |
| Diabetes <sup>b</sup>                     | Yes               | 44,059 (11.0)  | 43,700 (11.0)  | 359 (21.3)   | <0.001 |
| Prevalent liver disease                   | HBV infection     | 3,499 (0.9)    | 3,221 (0.8)    | 278 (16.5)   | <0.001 |
|                                           | HCV infection     | 669 (0.2)      | 605 (0.2)      | 64 (3.8)     |        |
|                                           | Liver cirrhosis   | 1,305 (0.3)    | 1,075 (0.3)    | 230 (13.6)   |        |
| Statin use during 6 months after baseline | No use            | 389,052 (97.2) | 387,395 (97.2) | 1657 (98.3)  | 0.006  |
|                                           | Use               | 11,266 (2.8)   | 11,237 (2.8)   | 29 (1.7)     |        |
| cDDDs during 6 months after baseline      | No use            | 389,052 (97.2) | 387,395 (97.2) | 1657 (98.3)  | 0.025  |
|                                           | ≤91               | 9,350 (2.3)    | 9,326 (2.3)    | 24 (1.4)     |        |
|                                           | >91               | 1,916 (0.5)    | 1,911 (0.5)    | 5 (0.3)      |        |
| Statin use within 2 years after baseline  | No use            | 366,896 (91.7) | 365,276 (91.6) | 1620 (96.1)  | <0.001 |
|                                           | Use               | 33,422 (8.3)   | 33,356 (8.4)   | 66 (3.9)     |        |

|                             |                |                |                |             |        |
|-----------------------------|----------------|----------------|----------------|-------------|--------|
| cDDD within                 | No use         | 366,896 (91.7) | 365,276 (91.6) | 1620 (96.1) | <0.001 |
| 2 years after baseline      | ≤182 days      | 25,288 (6.3)   | 25,237 (6.3)   | 51 (3.0)    |        |
|                             | 182.1-365 days | 5,741 (1.4)    | 5,733 (1.4)    | 8 (0.5)     |        |
|                             | >365 days      | 2,393 (0.6)    | 2,386 (0.6)    | 7 (0.4)     |        |
| Timing of statin initiation | No use         | 366,896 (91.7) | 365,276 (91.6) | 1620 (96.1) | <0.001 |
| after baseline              | ≤182 days      | 11,266 (2.8)   | 11,237 (2.8)   | 29 (1.7)    |        |
|                             | 183-365 days   | 7,085 (1.8)    | 7,070 (1.8)    | 15 (0.9)    |        |
|                             | >365 days      | 15,071 (3.8)   | 15,049 (3.8)   | 22 (1.3)    |        |

cDDDs, cumulative defined daily doses; HCC, hepatocellular carcinoma; HBV, hepatitis B virus; HCV, hepatitis C virus. Data are expressed as mean±SD or n (%).

The *p* values were calculated by the chi-square test and 1-way ANOVA between HCC development status.

<sup>a</sup>To convert total cholesterol from mg/dL to mmol/L, multiply by 0.02586.

<sup>b</sup>Known prevalent diabetes or fasting glucose ≥126 mg/dL at baseline.

**Table S2. Characteristics of participants according to statin use within 6 months after baseline health examinations.**

| Variables                                 | Characteristics   | Total          | Non user       | Statin user  | p      |
|-------------------------------------------|-------------------|----------------|----------------|--------------|--------|
|                                           |                   | N=400,318      | n=389,052      | n=11,266     |        |
| Age                                       | years             | 54.8 ±9.4      | 54.7 ±9.4      | 58.0 ±8.8    | <0.001 |
| Total cholesterol <sup>a</sup>            | mg/dL             | 198.6 ±36.7    | 197.2 ±35.5    | 247.8 ±42.7  | <0.001 |
| Body mass index                           | kg/m <sup>2</sup> | 23.9 ±2.9      | 23.9 ±2.9      | 24.8 ±2.9    | <0.001 |
| Sex                                       | Women             | 178,136 (44.5) | 171,749 (44.1) | 6,387 (56.7) | <0.001 |
|                                           | Men               | 222,182 (55.5) | 217,303 (55.9) | 4,879 (43.3) |        |
| Smoking status                            | Never smoker      | 256,473 (64.1) | 248,583 (63.9) | 7,890 (70.0) | <0.001 |
|                                           | Past smoker       | 35,280 (8.8)   | 34,431 (8.8)   | 849 (7.5)    |        |
|                                           | Current smoker    | 91,536 (22.9)  | 89,487 (23.0)  | 2,049 (18.2) |        |
|                                           | Missing           | 17,029 (4.3)   | 16,551 (4.3)   | 478 (4.2)    |        |
| Alcohol use, g ethanol/day                | None              | 217,990 (54.5) | 211,021 (54.2) | 6,969 (61.9) | <0.001 |
|                                           | <10               | 82,568 (20.6)  | 80,685 (20.7)  | 1,883 (16.7) |        |
|                                           | 10-39             | 72,219 (18.0)  | 70,565 (18.1)  | 1,654 (14.7) |        |
|                                           | ≥40               | 18,372 (4.6)   | 17,920 (4.6)   | 452 (4.0)    |        |
|                                           | Missing           | 9,169 (2.3)    | 8,861 (2.3)    | 308 (2.7)    |        |
| Physical activity                         | ≥1 times/week     | 168,723 (42.1) | 163,913 (42.1) | 4,810 (42.7) | 0.232  |
| Income status, decile                     | <4 (low-income)   | 89,060 (22.2)  | 86,725 (22.3)  | 2,335 (20.7) | <0.001 |
|                                           | 4-7               | 128,794 (32.2) | 125,134 (32.2) | 3,660 (32.5) |        |
|                                           | >7 (high-income)  | 182,464 (45.6) | 177,193 (45.5) | 5,271 (46.8) |        |
| Alanine aminotransferase,                 | <20 IU/L          | 176,623 (44.1) | 172,719 (44.4) | 3,904 (34.7) | <0.001 |
|                                           | 20-39 IU/L        | 178,698 (44.6) | 173,216 (44.5) | 5,482 (48.7) |        |
|                                           | 40-59 IU/L        | 30,845 (7.7)   | 29,629 (7.6)   | 1,216 (10.8) |        |
|                                           | 60-79 IU/L        | 8,059 (2.0)    | 7,680 (2.0)    | 379 (3.4)    |        |
|                                           | ≥80 IU/L          | 6,093 (1.5)    | 5,808 (1.5)    | 285 (2.5)    |        |
| Diabetes <sup>b</sup>                     | Yes               | 44,059 (11.0)  | 41,610 (10.7)  | 2,449 (21.7) | <0.001 |
| Incident HCC during follow-up             | Yes               | 1,686 (0.42)   | 1,657 (0.43)   | 29 (0.26)    | 0.006  |
| Prevalent liver disease                   | HBV infection     | 3,499 (0.9)    | 3,427 (0.9)    | 72 (0.6)     | 0.007  |
|                                           | HCV infection     | 669 (0.2)      | 659 (0.2)      | 10 (0.1)     | 0.039  |
|                                           | Liver cirrhosis   | 1,305 (0.3)    | 1,294 (0.3)    | 11 (0.1)     | <0.001 |
| Statin use during 6 months after baseline | No use            | 389,052 (97.2) | 389,052 (100)  | 0 (0.0)      | <0.001 |
|                                           | Use               | 11,266 (2.8)   | 0 (0.0)        | 11,266 (100) |        |
| cDDDs during 6 months after baseline      | No use            | 389,052 (97.2) | 389,052 (100)  | 0 (0.0)      | <0.001 |
|                                           | ≤91               | 9,350 (2.3)    | 0 (0.0)        | 9,350 (83.0) |        |
|                                           | >91               | 1,916 (0.5)    | 0 (0.0)        | 1,916 (17.0) |        |



|                                                 |                |                |                |              |        |
|-------------------------------------------------|----------------|----------------|----------------|--------------|--------|
| Statin use within 2 years after baseline        | No use         | 366,896 (91.7) | 366,896 (94.3) | 0 (0.0)      | <0.001 |
|                                                 | Use            | 33,422 (8.3)   | 22,156 (5.7)   | 11,266 (100) |        |
| cDDD <sub>s</sub> within 2 years after baseline | No use         | 366,896 (91.7) | 366,896 (94.3) | 0 (0.0)      | <0.001 |
|                                                 | ≤182 days      | 25,288 (6.3)   | 18,304 (4.7)   | 6,984 (62.0) |        |
|                                                 | 182.1-365 days | 5,741 (1.4)    | 3,133 (0.8)    | 2,608 (23.1) |        |
|                                                 | >365 days      | 2,393 (0.6)    | 719 (0.2)      | 1,674 (14.9) |        |
| Timing of statin initiation after baseline      | No use         | 366,896 (91.7) | 366,896 (94.3) | 0 (0.0)      | <0.001 |
|                                                 | ≤182 days      | 11,266 (2.8)   | 0 (0.0)        | 11,266 (100) |        |
|                                                 | 183-365 days   | 7,085 (1.8)    | 7,085 (1.8)    | 0 (0.0)      |        |
|                                                 | >365 days      | 15,071 (3.8)   | 15,071 (3.9)   | 0 (0.0)      |        |

cDDD<sub>s</sub>, cumulative defined daily doses; HCC, hepatocellular carcinoma; HBV, hepatitis B virus; HCV, hepatitis C virus. Data are expressed as mean±SD or n (%).

The *p* values were calculated by the chi-square test and 1-way ANOVA between HCC development status.

<sup>a</sup>To convert total cholesterol from mg/dL to mmol/L, multiply by 0.02586.

<sup>b</sup>Known prevalent diabetes or fasting glucose ≥126 mg/dL at baseline.

**Table S3. HRs<sup>a</sup> for HCC incidence associated with statin use and total cholesterol in prevalent user included cohort (n=418,382)**

| TC or statins use characteristics                                                             | No. of participants | HCC cases | Age-sex-adjusted |                  | Multivariable-except TC-adjusted |                  | Multivariable-including TC-adjusted (Main analysis) |                  |
|-----------------------------------------------------------------------------------------------|---------------------|-----------|------------------|------------------|----------------------------------|------------------|-----------------------------------------------------|------------------|
|                                                                                               |                     |           | p-value          | HR (95% CI)      | p-value                          | HR (95% CI)      | p-value                                             | HR (95% CI)      |
| 1 mmol/L (39 mg/dL) increase in TC <sup>b</sup>                                               | 418,382             | 1842      | <0.001           | 0.47 (0.44-0.49) |                                  |                  | <0.001                                              | 0.56 (0.53-0.59) |
| <b><i>Statin use within past 6 months before baseline</i></b>                                 |                     |           |                  |                  |                                  |                  |                                                     |                  |
| No use                                                                                        | 400,981             | 1814      |                  | 1.00 (Reference) |                                  | 1.00 (Reference) |                                                     | 1.00 (Reference) |
| Use                                                                                           | 17,401              | 28        | <0.001           | 0.35 (0.24-0.51) | <0.001                           | 0.31 (0.22-0.46) | <0.001                                              | 0.27 (0.18-0.39) |
| ≤91 cDDDs                                                                                     | 12,502              | 19        | <0.001           | 0.33 (0.21-0.52) | <0.001                           | 0.30 (0.19-0.46) | <0.001                                              | 0.28 (0.18-0.44) |
| >91 cDDDs                                                                                     | 4,899               | 9         | 0.005            | 0.39 (0.20-0.75) | 0.002                            | 0.36 (0.19-0.69) | <0.001                                              | 0.25 (0.13-0.47) |
| per 60 cDDD increase                                                                          | 418,382             | 1842      | <0.001           | 0.53 (0.39-0.70) | <0.001                           | 0.48 (0.36-0.65) | <0.001                                              | 0.42 (0.32-0.57) |
| <b><i>Statin use within past 2 years before baseline</i></b>                                  |                     |           |                  |                  |                                  |                  |                                                     |                  |
| No use                                                                                        | 389,291             | 1786      |                  | 1.00 (Reference) |                                  | 1.00 (Reference) |                                                     | 1.00 (Reference) |
| Use                                                                                           | 29,091              | 56        | <0.001           | 0.42 (0.32-0.54) | <0.001                           | 0.38 (0.29-0.49) | <0.001                                              | 0.39 (0.30-0.51) |
| ≤182 cDDDs                                                                                    | 21,315              | 40        | <0.001           | 0.41 (0.30-0.56) | <0.001                           | 0.37 (0.27-0.51) | <0.001                                              | 0.43 (0.32-0.59) |
| 183-365 cDDDs                                                                                 | 5,437               | 10        | 0.002            | 0.38 (0.20-0.71) | <0.001                           | 0.34 (0.18-0.64) | <0.001                                              | 0.29 (0.16-0.54) |
| >365 cDDDs                                                                                    | 2,339               | 6         | 0.127            | 0.54 (0.24-1.19) | 0.098                            | 0.51 (0.23-1.13) | 0.013                                               | 0.36 (0.16-0.80) |
| per 60 cDDD increase                                                                          | 418,382             | 1842      | <0.001           | 0.81 (0.73-0.89) | <0.001                           | 0.78 (0.71-0.87) | <0.001                                              | 0.77 (0.70-0.85) |
| No use                                                                                        | 389,291             | 1786      |                  | 1.00 (Reference) |                                  | 1.00 (Reference) |                                                     | 1.00 (Reference) |
| Last prescription ≤182 days before baseline (Prevalent users within 6 months before baseline) | 17,401              | 28        | <0.001           | 0.34 (0.24-0.50) | <0.001                           | 0.31 (0.21-0.45) | <0.001                                              | 0.27 (0.18-0.39) |
| Last prescription 183-365 days before baseline                                                | 4,821               | 7         | 0.003            | 0.32 (0.15-0.68) | 0.002                            | 0.32 (0.15-0.66) | 0.045                                               | 0.47 (0.22-0.98) |
| Last prescription 366-730 days before baseline                                                | 6,869               | 21        | 0.068            | 0.67 (0.44-1.03) | 0.017                            | 0.59 (0.38-0.91) | 0.547                                               | 0.88 (0.57-1.35) |

| TC or statins use characteristics                | No. of participants | HCC cases | Age-sex-adjusted |                  | Multivariable-except TC-adjusted |                  | Multivariable-including TC-adjusted (Main analysis) |                  |
|--------------------------------------------------|---------------------|-----------|------------------|------------------|----------------------------------|------------------|-----------------------------------------------------|------------------|
|                                                  |                     |           | p-value          | HR (95% CI)      | P-value                          | HR (95% CI)      | P-value                                             | HR (95% CI)      |
| 1 mmol/L (39 mg/dL) increase in TC <sup>c</sup>  | 418,382             | 1842      | <0.001           | 0.47 (0.45-0.50) |                                  |                  | <0.001                                              | 0.56 (0.53-0.59) |
| <b>Statin use within 6 months after baseline</b> |                     |           |                  |                  |                                  |                  |                                                     |                  |
| No use                                           | 394,133             | 1793      |                  | 1.00 (Reference) |                                  | 1.00 (Reference) |                                                     | 1.00 (Reference) |
| Use                                              | 24,249              | 49        | <0.001           | 0.45 (0.34-0.60) | <0.001                           | 0.41 (0.31-0.54) | <0.001                                              | 0.45 (0.34-0.60) |
| ≤91 cDDD                                         | 17,073              | 33        | <0.001           | 0.44 (0.31-0.61) | <0.001                           | 0.40 (0.28-0.56) | <0.001                                              | 0.49 (0.35-0.69) |
| >91 cDDD                                         | 7,176               | 16        | 0.004            | 0.48 (0.29-0.79) | <0.001                           | 0.43 (0.26-0.71) | <0.001                                              | 0.38 (0.23-0.62) |
| per 60 cDDD increase                             | 418,382             | 1842      | <0.001           | 0.56 (0.45-0.71) | <0.001                           | 0.53 (0.42-0.67) | <0.001                                              | 0.55 (0.44-0.68) |
| <b>Statin use within 2 years after baseline</b>  |                     |           |                  |                  |                                  |                  |                                                     |                  |
| No use                                           | 370,250             | 1754      |                  | 1.00 (Reference) |                                  | 1.00 (Reference) |                                                     | 1.00 (Reference) |
| Use                                              | 48,132              | 88        | <0.001           | 0.39 (0.31-0.48) | <0.001                           | 0.37 (0.29-0.45) | <0.001                                              | 0.45 (0.36-0.56) |
| ≤182 cDDD                                        | 30,220              | 58        | <0.001           | 0.42 (0.32-0.54) | <0.001                           | 0.40 (0.30-0.52) | <0.001                                              | 0.55 (0.42-0.71) |
| 183-365 cDDD                                     | 10,670              | 10        | <0.001           | 0.20 (0.10-0.36) | <0.001                           | 0.18 (0.10-0.33) | <0.001                                              | 0.21 (0.11-0.38) |
| >365 cDDD                                        | 7,242               | 20        | 0.006            | 0.54 (0.35-0.84) | 0.004                            | 0.52 (0.33-0.81) | 0.001                                               | 0.48 (0.31-0.74) |
| per 60 cDDD increase                             | 418,382             | 1842      | <0.001           | 0.83 (0.78-0.88) | <0.001                           | 0.82 (0.77-0.87) | <0.001                                              | 0.84 (0.80-0.89) |

cDDD, cumulative DDDs; CI, confidence interval; DDD, defined daily dose; HCC, hepatocellular carcinoma; HR, hazard ratio; TC, total cholesterol

<sup>a</sup> HRs were calculated by Cox models stratified by age (baseline age, years: 40-44, 45-54, 55-64, 65-74, ≥75), after adjustment for age at baseline, sex, pre-existing diabetes, smoking status, alcohol use, physical activity, hepatitis B virus infection, hepatitis C virus infection, liver cirrhosis, body mass index, and alanine aminotransferase.

<sup>b</sup> Statins use within past 6 months before baseline was used in the multivariable analysis.

<sup>c</sup> Statins use within 6 months after baseline was used in the multivariable analysis.

To convert cholesterol from mg/dL to mmol/L, multiply by 0.02586

**Table S4. HRs<sup>a</sup> for HCC incidence associated with statin use and total cholesterol (TC) according to TC levels at baseline in main cohort participants (n=400,318, Sensitivity analysis)**

| TC, mg/dL           | TC or statins use characteristics                       | No. of participants | HCC cases | Multivariable-except TC-adjusted |                  | Multivariable-including TC-adjusted |                  |
|---------------------|---------------------------------------------------------|---------------------|-----------|----------------------------------|------------------|-------------------------------------|------------------|
|                     |                                                         |                     |           | p-value                          | HR (95% CI)      | p-value                             | HR (95% CI)      |
| All participants    | 1 mmol/L (39 mg/dL) increase in TC                      | 400,318             | 1686      |                                  |                  | <0.001                              | 0.54 (0.51-0.58) |
|                     | <b><i>Statin use within 6 months after baseline</i></b> |                     |           |                                  |                  |                                     |                  |
|                     | No use                                                  | 389,052             | 1,657     |                                  | 1.00 (Reference) |                                     | 1.00 (Reference) |
|                     | Use                                                     | 11,266              | 29        | 0.005                            | 0.59 (0.41-0.85) | 0.427                               | 1.16 (0.80-1.69) |
| 240≤TC<400<br>mg/dL | 1 mmol/L (39 mg/dL) increase in TC                      | 51,118              | 63        |                                  |                  | 0.283                               | 0.77 (0.48-1.24) |
|                     | <b><i>Statin use within 6 months after baseline</i></b> |                     |           |                                  |                  |                                     |                  |
|                     | No use                                                  | 44,296              | 55        |                                  | 1.00 (Reference) |                                     | 1.00 (Reference) |
|                     | Use                                                     | 6,822               | 8         | 0.816                            | 0.91 (0.43-1.94) | 0.952                               | 0.98 (0.46-2.09) |
| 200≤TC<240<br>mg/dL | 1 mmol/L (39 mg/dL) increase in TC                      | 133,509             | 286       |                                  |                  | 0.166                               | 0.75 (0.50-1.13) |
|                     | <b><i>Statin use within 6 months after baseline</i></b> |                     |           |                                  |                  |                                     |                  |
|                     | No use                                                  | 130,552             | 278       |                                  |                  |                                     | 1.00 (Reference) |
|                     | Use                                                     | 2,957               | 8         | 0.958                            | 0.98 (0.48-1.99) | 0.966                               | 1.02 (0.50-2.07) |
| TC<200<br>mg/dL     | 1 mmol/L (39 mg/dL) increase in TC                      | 215,587             | 1336      |                                  |                  | <0.001                              | 0.57 (0.52-0.63) |
|                     | <b><i>Statin use within 6 months after baseline</i></b> |                     |           |                                  |                  |                                     |                  |
|                     | No use                                                  | 214,131             | 1,323     |                                  | 1.00 (Reference) |                                     | 1.00 (Reference) |
|                     | Use                                                     | 1,456               | 13        | 0.432                            | 1.25 (0.72-2.15) | 0.223                               | 1.41 (0.81-2.43) |

HCC, hepatocellular carcinoma; HR, hazard ratio; TC, total cholesterol

<sup>a</sup> HRs were calculated by Cox models stratified by age (baseline age, years: 40-44, 45-54, 55-64, 65-74, ≥75), after adjustment for age at baseline, sex, pre-existing diabetes, smoking status, alcohol use, physical activity, hepatitis B virus infection, hepatitis C virus infection, liver cirrhosis, body mass index, and alanine aminotransferase.

To convert cholesterol from mg/dL to mmol/L, multiply by 0.02586.

**Table S5. HRs<sup>a</sup> for HCC incidence associated with statin use and total cholesterol (TC) after excluding prevalent users within 2 years before baseline and first 2 years of follow-up (n=385,945, Sensitivity analysis)**

| TC or statins use characteristics                       | No. of participants | HCC cases | Age-sex-adjusted |                  | Multivariable-except TC-adjusted |                  | Multivariable-including TC-adjusted (Main analysis) |                  |
|---------------------------------------------------------|---------------------|-----------|------------------|------------------|----------------------------------|------------------|-----------------------------------------------------|------------------|
|                                                         |                     |           | p-value          | HR (95% CI)      | p-value                          | HR (95% CI)      | p-value                                             | HR (95% CI)      |
| 1 mmol/L (39 mg/dL) increase in TC <sup>b</sup>         | 385,945             | 1363      | <0.001           | 0.46 (0.43-0.50) |                                  |                  | <0.001                                              | 0.56 (0.52-0.59) |
| <b><i>Statin use within 6 months after baseline</i></b> |                     |           |                  |                  |                                  |                  |                                                     |                  |
| No use                                                  | 376,966             | 1345      |                  | 1.00 (Reference) |                                  | 1.00 (Reference) |                                                     | 1.00 (Reference) |
| Use                                                     | 8,979               | 18        | 0.031            | 0.60 (0.38-0.95) | 0.010                            | 0.54 (0.34-0.86) | 0.948                                               | 1.02 (0.63-1.63) |
| ≤91 cDDD                                                | 7,500               | 14        | 0.028            | 0.55 (0.33-0.94) | 0.008                            | 0.49 (0.29-0.83) | 0.728                                               | 0.91 (0.53-1.55) |
| >91 cDDD                                                | 1,479               | 4         | 0.727            | 0.84 (0.31-2.24) | 0.744                            | 0.85 (0.32-2.27) | 0.282                                               | 1.72 (0.64-4.60) |
| per 60 cDDD increase                                    | 385,945             | 1363      | 0.159            | 0.74 (0.49-1.12) | 0.094                            | 0.69 (0.45-1.06) | 0.560                                               | 1.12 (0.77-1.62) |
| <40 cDDD (<50 <sup>th</sup> percentile)                 | 3,951               | 9         | 0.223            | 0.66 (0.35-1.28) | 0.111                            | 0.59 (0.30-1.13) | 0.898                                               | 1.04 (0.54-2.02) |
| ≥40 cDDD (≥50 <sup>th</sup> percentile)                 | 5,028               | 9         | 0.069            | 0.54 (0.28-1.05) | 0.039                            | 0.50 (0.26-0.96) | 0.974                                               | 0.99 (0.51-1.91) |
| <b><i>Statin use within 2 years after baseline</i></b>  |                     |           |                  |                  |                                  |                  |                                                     |                  |
| No use                                                  | 357,465             | 1316      |                  | 1.00 (Reference) |                                  | 1.00 (Reference) |                                                     | 1.00 (Reference) |
| Use                                                     | 28,480              | 47        | <0.001           | 0.46 (0.34-0.61) | <0.001                           | 0.44 (0.33-0.59) | 0.007                                               | 0.67 (0.50-0.90) |
| ≤182 cDDD                                               | 21,917              | 33        | <0.001           | 0.43 (0.30-0.60) | <0.001                           | 0.41 (0.29-0.58) | 0.006                                               | 0.61 (0.43-0.87) |
| 183-365 cDDD                                            | 4,616               | 7         | 0.018            | 0.41 (0.19-0.86) | 0.011                            | 0.38 (0.18-0.80) | 0.156                                               | 0.58 (0.28-1.23) |
| >365 cDDD                                               | 1,947               | 7         | 0.840            | 0.93 (0.44-1.95) | 0.780                            | 0.90 (0.43-1.89) | 0.286                                               | 1.50 (0.71-3.17) |
| per 60 cDDD increase                                    | 385,945             | 1363      | 0.004            | 0.87 (0.79-0.95) | 0.002                            | 0.85 (0.77-0.94) | 0.336                                               | 0.96 (0.87-1.05) |
| <30 cDDD (1 <sup>st</sup> quartile)                     | 7,083               | 14        | 0.026            | 0.55 (0.32-0.93) | 0.020                            | 0.53 (0.31-0.90) | 0.369                                               | 0.78 (0.46-1.33) |
| 30-79 cDDD (2 <sup>nd</sup> quartile)                   | 7,482               | 8         | <0.001           | 0.30 (0.15-0.61) | <0.001                           | 0.30 (0.15-0.60) | 0.021                                               | 0.44 (0.22-0.88) |

|                                                     |        |    |        |                  |        |                  |       |                  |
|-----------------------------------------------------|--------|----|--------|------------------|--------|------------------|-------|------------------|
| 80-179 cDDD <sub>s</sub> (3 <sup>rd</sup> quartile) | 7,003  | 10 | 0.005  | 0.41 (0.22-0.76) | 0.002  | 0.37 (0.20-0.70) | 0.103 | 0.59 (0.32-1.11) |
| ≥180 cDDD <sub>s</sub> (4 <sup>th</sup> quartile)   | 6,912  | 15 | 0.035  | 0.58 (0.35-0.96) | 0.019  | 0.54 (0.33-0.91) | 0.544 | 0.85 (0.51-1.43) |
| Statin initiation ≤182 days after baseline          | 8,979  | 18 | 0.021  | 0.58 (0.36-0.92) | 0.006  | 0.52 (0.32-0.82) | 0.934 | 0.98 (0.61-1.57) |
| Statin initiation 183-365 days after baseline       | 5,997  | 11 | 0.023  | 0.50 (0.28-0.91) | 0.013  | 0.47 (0.26-0.85) | 0.209 | 0.68 (0.38-1.24) |
| Statin initiation >365 days after baseline          | 13,504 | 18 | <0.001 | 0.37 (0.23-0.58) | <0.001 | 0.37 (0.23-0.58) | 0.004 | 0.50 (0.31-0.80) |

cDDD<sub>s</sub> cumulative DDD<sub>s</sub>; CI, confidence interval; DDD, defined daily dose; HCC, hepatocellular carcinoma; HR, hazard ratio; TC, total cholesterol

<sup>a</sup> HRs were calculated by Cox models stratified by age (baseline age, years: 40-44, 45-54, 55-64, 65-74, ≥75), after adjustment for age at baseline, sex, pre-existing diabetes, smoking status, alcohol use, physical activity, hepatitis B virus infection, hepatitis C virus infection, liver cirrhosis, body mass index, and systolic blood pressure.

<sup>b</sup> Statins use within 6 months after baseline was used in the multivariable analysis.

To convert cholesterol from mg/dL to mmol/L, multiply by 0.02586.

**Table S6. HRs<sup>a</sup> for HCC incidence associated with statin use and total cholesterol (TC) according to liver diseases status in the main cohort (n=400,318) and prevalent user included cohort (n=418,382)**

|                    |                                                                                           | TC or statins use characteristics                |  | No. of participants | HCC cases | Multivariable-except TC-adjusted |                  | Multivariable-including TC-adjusted (Main model) |                  |
|--------------------|-------------------------------------------------------------------------------------------|--------------------------------------------------|--|---------------------|-----------|----------------------------------|------------------|--------------------------------------------------|------------------|
|                    |                                                                                           |                                                  |  |                     |           | p-value                          | HR (95% CI)      | p-value                                          | HR (95% CI)      |
| <b>Main Cohort</b> | Any LD defined by                                                                         | 1 mmol/L (39 mg/dL) increase in TC               |  | 70,179              | 1269      |                                  |                  | <0.001                                           | 0.55 (0.52-0.59) |
| <b>n=400318</b>    | ALT $\geq$ 40 or AST $\geq$ 40 or diagnostic codes for viral hepatitis or LD <sup>b</sup> | <b>Statin use within 6 months after baseline</b> |  |                     |           |                                  |                  |                                                  |                  |
|                    |                                                                                           | No use                                           |  | 67,410              | 1,250     |                                  | 1.00 (Reference) |                                                  | 1.00 (Reference) |
|                    |                                                                                           | Use                                              |  | 2,769               | 19        | <0.001                           | 0.47 (0.30-0.73) | 0.730                                            | 0.92 (0.58-1.46) |
|                    | No LD defined by                                                                          | 1 mmol/L (39 mg/dL) increase in TC               |  | 330,139             | 417       |                                  |                  | <0.001                                           | 0.55 (0.49-0.62) |
|                    | ALT<40 and AST<40 and no diagnostic codes for viral hepatitis or LD <sup>b</sup>          | <b>Statin use within 6 months after baseline</b> |  |                     |           |                                  |                  |                                                  |                  |
|                    |                                                                                           | No use                                           |  | 321,642             | 407       |                                  | 1.00 (Reference) |                                                  | 1.00 (Reference) |
|                    |                                                                                           | Use                                              |  | 8,497               | 10        | 0.694                            | 0.88 (0.47-1.65) | 0.162                                            | 1.58 (0.83-2.98) |
|                    | LD defined by                                                                             | 1 mmol/L (39 mg/dL) increase in TC               |  | 23,690              | 677       |                                  |                  | <0.001                                           | 0.60 (0.54-0.65) |
|                    | diagnostic codes for viral hepatitis or LD <sup>b</sup>                                   | <b>Statin use within 6 months after baseline</b> |  |                     |           |                                  |                  |                                                  |                  |
|                    |                                                                                           | No use                                           |  | 22,668              | 667       |                                  | 1.00 (Reference) |                                                  | 1.00 (Reference) |
|                    |                                                                                           | Use                                              |  | 1,022               | 10        | 0.019                            | 0.47 (0.25-0.88) | 0.734                                            | 0.90 (0.47-1.69) |
|                    | No LD defined by                                                                          | 1 mmol/L (39 mg/dL) increase in TC               |  | 376,628             | 1009      |                                  |                  | <0.001                                           | 0.53 (0.49-0.57) |
|                    | no diagnostic codes for viral hepatitis or LD <sup>b</sup>                                | <b>Statin use within 6 months after baseline</b> |  |                     |           |                                  |                  |                                                  |                  |
|                    |                                                                                           | No use                                           |  | 366,384             | 990       |                                  | 1.00 (Reference) |                                                  | 1.00 (Reference) |
|                    |                                                                                           | Use                                              |  | 10,244              | 19        | 0.028                            | 0.60 (0.38-0.95) | 0.507                                            | 1.17 (0.74-1.85) |

|                                   |                                                                                                             |                                                  |           | Multivariable-except TC-adjusted |                  | Multivariable-including TC-adjusted (Main model) |                  |                  |
|-----------------------------------|-------------------------------------------------------------------------------------------------------------|--------------------------------------------------|-----------|----------------------------------|------------------|--------------------------------------------------|------------------|------------------|
| TC or statins use characteristics |                                                                                                             | No. of participants                              | HCC cases | p-value                          | HR (95% CI)      | p-value                                          | HR (95% CI)      |                  |
| <b>Prevalent User</b>             | Any LD defined by ALT $\geq$ 40 or AST $\geq$ 40 or diagnostic codes for viral hepatitis or LD <sup>b</sup> | 1 mmol/L (39 mg/dL) increase in TC               | 75,013    | 1391                             |                  | <0.001                                           | 0.58 (0.55-0.62) |                  |
| <b>Included Cohort</b>            |                                                                                                             | <b>Statin use within 6 months after baseline</b> |           |                                  |                  |                                                  |                  |                  |
|                                   |                                                                                                             | No use                                           | 68,931    | 1,364                            | 1.00 (Reference) |                                                  | 1.00 (Reference) |                  |
|                                   |                                                                                                             | Use                                              | 6,082     | 27                               | <0.001           | 0.27 (0.19-0.40)                                 | <0.001           | 0.31 (0.21-0.46) |
| <b>n=418382</b>                   | No LD defined by ALT<40 and AST<40 and no diagnostic codes for viral hepatitis or LD <sup>b</sup>           | 1 mmol/L (39 mg/dL) increase in TC               | 343,369   | 451                              |                  | <0.001                                           | 0.58 (0.52-0.64) |                  |
|                                   |                                                                                                             | <b>Statin use within 6 months after baseline</b> |           |                                  |                  |                                                  |                  |                  |
|                                   |                                                                                                             | No use                                           | 325,202   | 429                              | 1.00 (Reference) |                                                  | 1.00 (Reference) |                  |
|                                   |                                                                                                             | Use                                              | 18,167    | 22                               | 0.222            | 0.76 (0.49-1.18)                                 | 0.240            | 0.77 (0.50-1.19) |
|                                   | LD defined by diagnostic codes for viral hepatitis or LD <sup>b</sup>                                       | 1 mmol/L (39 mg/dL) increase in TC               | 25,792    | 763                              |                  | <0.001                                           | 0.63 (0.57-0.68) |                  |
|                                   |                                                                                                             | <b>Statin use within 6 months after baseline</b> |           |                                  |                  |                                                  |                  |                  |
|                                   |                                                                                                             | No use                                           | 23,512    | 750                              | 1.00 (Reference) |                                                  | 1.00 (Reference) |                  |
|                                   |                                                                                                             | Use                                              | 2,280     | 13                               | <0.001           | 0.25 (0.14-0.43)                                 | <0.001           | 0.31 (0.18-0.53) |
|                                   | No LD defined by no diagnostic codes for viral hepatitis or LD <sup>b</sup>                                 | 1 mmol/L (39 mg/dL) increase in TC               | 392,590   | 1079                             |                  | <0.001                                           | 0.55 (0.51-0.59) |                  |
|                                   |                                                                                                             | <b>Statin use within 6 months after baseline</b> |           |                                  |                  |                                                  |                  |                  |
|                                   |                                                                                                             | No use                                           | 370,621   | 1,043                            | 1.00 (Reference) |                                                  | 1.00 (Reference) |                  |
|                                   |                                                                                                             | Use                                              | 21,969    | 36                               | <0.001           | 0.55 (0.39-0.77)                                 | <0.001           | 0.57 (0.40-0.79) |

ALT, alanine aminotransferase; CI, confidence interval; HCC, hepatocellular carcinoma; HR, hazard ratio; LD, liver diseases; TC, total cholesterol

<sup>a</sup> HRs were calculated by Cox models stratified by age (baseline age, years: 40-44, 45-54, 55-64, 65-74,  $\geq$ 75), after adjustment for age at baseline, sex, pre-existing diabetes, smoking status, alcohol use, physical activity, hepatitis B virus infection (when applicable), hepatitis C virus infection (when applicable), liver cirrhosis (when applicable), body mass index, and ALT (when applicable).

<sup>b</sup> Individuals were considered to have viral hepatitis (B15-B19) or non-viral liver diseases (K70-K77) at baseline if they visited a medical institution for the diseases - either as inpatients or outpatients - at least once within 12 months before or 2 months after the baseline health examination date.

To convert cholesterol from mg/dL to mmol/L, multiply by 0.02586.



**Table S7. Total cholesterol (TC) levels at health examinations (HEs) during 2002-2003 and 2004-2007 according to statin use status around the time of the HEs in prevalent user included cohort (n=418,382)**

| Statin use status group <sup>a</sup> | New users or re-initiators <sup>b</sup> |                     | Statin quitters at the time of 2004-2007 HEs <sup>c</sup> | Statin-unaffected TC measurements available <sup>d</sup> |                  | No. of participants | Sex and age-adjusted TC-related measurements <sup>e</sup> , mg/dL |                                                        |                                            |                           | Statin use around the time of the 2002-2003 HEs |                       | Statin use around the time of the 2004-2007 HEs |                       |
|--------------------------------------|-----------------------------------------|---------------------|-----------------------------------------------------------|----------------------------------------------------------|------------------|---------------------|-------------------------------------------------------------------|--------------------------------------------------------|--------------------------------------------|---------------------------|-------------------------------------------------|-----------------------|-------------------------------------------------|-----------------------|
|                                      | After 2002-2003 HEs                     | After 2004-2007 HEs |                                                           | At 2002-2003 HEs                                         | At 2004-2007 HEs |                     | Mean TC levels at 2002-2003 HEs (95% CIs) <sup>f</sup>            | Mean TC levels at 2004-2007 HEs (95% CIs) <sup>f</sup> | Sex/age-adjusted TC difference between HEs | P value for TC difference | Within 6 months before                          | Within 6 months after | Within 6 months before                          | Within 6 months after |
| 1                                    |                                         |                     |                                                           | Yes                                                      | Yes              | 383,168             | <b>197.8 (197.7-197.9)</b>                                        | <b>196.8 (196.6-196.9)</b>                             | -1.1                                       | <0.001                    | No                                              | No                    | No                                              | No                    |
| 2                                    |                                         | Yes                 |                                                           | Yes                                                      | Yes              | 9750                | <b>230.3 (229.6-231.1)</b>                                        | <b>245.7 (245.0-246.4)</b>                             | 15.4                                       | <0.001                    | No                                              | No                    | No                                              | Yes                   |
| 3                                    |                                         |                     |                                                           | Yes                                                      |                  | 3377                | <b>226.1 (224.8-227.3)</b>                                        | 208.9 (207.7-210.1)                                    | -17.2                                      | <0.001                    | No                                              | No                    | Yes                                             | No                    |
| 4                                    |                                         |                     |                                                           | Yes                                                      |                  | 7396                | <b>228.4 (227.5-229.2)</b>                                        | 186.8 (186.0-187.6)                                    | -41.6                                      | <0.001                    | No                                              | No                    | Yes                                             | Yes                   |
| 5                                    | Yes                                     |                     | Yes                                                       | Yes                                                      | Yes              | 3397                | <b>246.7 (245.5-248.0)</b>                                        | <b>224.5 (223.3-225.7)</b>                             | -22.3                                      | <0.001                    | No                                              | Yes                   | No                                              | No                    |
| 6                                    | Yes                                     | Yes                 | Yes                                                       | Yes                                                      | Yes              | 790                 | <b>265.3 (262.7-267.9)</b>                                        | <b>257.1 (254.6-259.6)</b>                             | -8.3                                       | <0.001                    | No                                              | Yes                   | No                                              | Yes                   |
| 7                                    | Yes                                     |                     |                                                           | Yes                                                      |                  | 555                 | <b>260.1 (257.0-263.2)</b>                                        | 220.1 (217.2-223.1)                                    | -39.9                                      | <0.001                    | No                                              | Yes                   | Yes                                             | No                    |
| 8                                    | Yes                                     |                     |                                                           | Yes                                                      |                  | 1974                | <b>252.7 (251.0-254.3)</b>                                        | 197.0 (195.4-198.6)                                    | -55.7                                      | <0.001                    | No                                              | Yes                   | Yes                                             | Yes                   |
| 9                                    |                                         |                     | Yes                                                       |                                                          | Yes              | 1807                | 216.0 (214.2-217.7)                                               | <b>222.1 (220.4-223.7)</b>                             | 6.1                                        | <0.001                    | Yes                                             | No                    | No                                              | No                    |
| 10                                   |                                         | Yes                 | Yes                                                       |                                                          | Yes              | 330                 | 230.0 (226.0-234.0)                                               | <b>254.6 (250.7-258.5)</b>                             | 24.6                                       | <0.001                    | Yes                                             | No                    | No                                              | Yes                   |
| 11                                   |                                         |                     |                                                           |                                                          |                  | 137                 | 222.9 (216.7-229.1)                                               | 221.6 (215.6-227.6)                                    | -1.4                                       | 0.647                     | Yes                                             | No                    | Yes                                             | No                    |
| 12                                   |                                         |                     |                                                           |                                                          |                  | 464                 | 222.7 (219.3-226.1)                                               | 207.7 (204.4-210.9)                                    | -15.0                                      | <0.001                    | Yes                                             | No                    | Yes                                             | Yes                   |
| 13                                   |                                         |                     | Yes                                                       |                                                          | Yes              | 1330                | 201.9 (199.9-203.9)                                               | <b>221.0 (219.1-222.9)</b>                             | 19.1                                       | <0.001                    | Yes                                             | Yes                   | No                                              | No                    |
| 14                                   |                                         | Yes                 | Yes                                                       |                                                          | Yes              | 409                 | 216.9 (213.3-220.5)                                               | <b>251.8 (248.4-255.3)</b>                             | 34.9                                       | <0.001                    | Yes                                             | Yes                   | No                                              | Yes                   |
| 15                                   |                                         |                     |                                                           |                                                          |                  | 362                 | 212.0 (208.2-215.8)                                               | 213.2 (209.5-216.9)                                    | 1.2                                        | 0.509                     | Yes                                             | Yes                   | Yes                                             | No                    |
| 16                                   |                                         |                     |                                                           |                                                          |                  | 3136                | 204.0 (202.7-205.3)                                               | 193.7 (192.4-194.9)                                    | -10.3                                      | <0.001                    | Yes                                             | Yes                   | Yes                                             | Yes                   |

<sup>a</sup> Statin use status was classified into 16 groups according to statin use within 6 months before/after 2002-2003 HEs and within 6 months before/after 2004-2007 HEs.

<sup>b</sup> New users (or re-initiators) were defined as those who had used no statins within 6 months before HEs but started using within 6 months after HEs.

<sup>c</sup> Statin quitters at the time of 2004-2007 HEs were defined as those who had used statin around the time of the 2002-2003 HEs but quit statins at least 6 months before 2004-2007 HEs.

<sup>d</sup> Statin-unaffected TC measurements were defined as TC levels in those who had used no statin within 6 months before HEs.

<sup>e</sup> The mean of TC levels (95% CIs) and the differences in TC levels between HEs were the estimated sex and age adjusted marginal means calculated by LSMEANS statements in generalized linear models using SAS 9.4

<sup>f</sup> Statin-unaffected TC measurements were highlighted with bold font

To convert cholesterol from mg/dL to mmol/L, multiply by 0.02586.
